# Supplementary material for: High genetic polymorphism of relapsing P. vivax isolates in northwest Colombia
Source: PubMed Central journal article supplement (PMC3485554; doi:10.1016/j.actatropica.2011.03.012), 2011-07
Supplement: mmc1.pdf [file mmc1.pdf]

Supplemental data.

Table. Detailed description of the haplotype denomination, origin, type of sample (recurrence-relapse) and dose of primaquine (PQ) administered according to clinical sample. Lack of amplification is denoted by (-).

| Sample Code | Haplotype designation | Microsatellite |       |        | Total dose (mg) of primaquine administered |
|-------------|-----------------------|----------------|-------|--------|--------------------------------------------|
|             |                       | 1,501          | 3,502 | 14,297 |                                            |
| 145         | 1                     | 94             | 157   | 200    | 210                                        |
| 145r        | 1                     | 94             | 157   | 200    | 210                                        |
| 146         | 1                     | 94             | 157   | 200    | 150                                        |
| 146*        | 2                     | 114            | 157   | 200    | 150                                        |
| 146rr       | 2                     | 114            | 157   | 200    | 150                                        |
| 147         | 3                     | 94             | 157   | -      | 150                                        |
| 147r        | 3                     | 94             | 157   | -      | 150                                        |
| 150         | 2                     | 114            | 157   | 200    | 150                                        |
| 150r        | 2                     | 114            | 157   | 200    | 150                                        |
| 152         | 4                     | 94             | 157   | 216    | 210                                        |
| 152r        | 3                     | 94             | 157   |        | 210                                        |
| 153         | 5                     | 94             | 133   | 200    | 105                                        |
| 153r        | 4                     | 94             | 157   | 216    | 105                                        |
| 157         | 2                     | 114            | 157   | 200    | 210                                        |
| 157r        | 6                     | 114            | 157   | 216    | 210                                        |
| 158         | 7                     | 94             | -     | 200    | 150                                        |
| 158r        | 7                     | 94             | -     | 200    | 150                                        |
| 160         | 8                     | 131            | -     | 200    | 210                                        |
| 160*        | 9                     | 70             | -     | 200    | 210                                        |
| 160r        | 8                     | 131            | -     | 200    | 210                                        |
| 161         | 10                    | 94             | 133   | 210    | 150                                        |
| 161r        | 11                    | 131            | 157   | 210    | 150                                        |
| 161r        | 12                    | 131            | 157   | 272    | 150                                        |
| 168         | 13                    | 94             | 150   | 210    | 105                                        |
| 168r        | 14                    | 94             | -     | 210    | 105                                        |
| 168r*       | 15                    | 94             | -     | 272    | 105                                        |
| 172         | 16                    | 114            | 133   | 210    | 105                                        |
| 172r        | 17                    | 94             | 150   | 200    | 105                                        |
| 172r*       | 18                    | 94             | 150   | 255    | 105                                        |
| 176         | 19                    | 114            | 157   | 210    | 105                                        |
| 176r        | 19                    | 114            | 157   | 210    | 105                                        |
| 176r*       | 20                    | 114            | 157   | 272    | 105                                        |
| 177         | 10                    | 94             | 133   | 210    | 150                                        |
| 177*        | 21                    | 94             | 133   | 272    | 150                                        |
| 177r        | 22                    | 94             | 113   | 210    | 150                                        |
| 178         | 23                    | 200            | 150   | 220    | 105                                        |
| 178r        | 24                    | 94             | 150   | 220    | 105                                        |
| 182         | 24                    | 94             | 150   | 220    | 150                                        |
| 182r        | 24                    | 94             | 150   | 220    | 150                                        |

Turbo

|       |    |     |     |     |     |
|-------|----|-----|-----|-----|-----|
| 182r  | 25 | 131 | 150 | 220 | 150 |
| 188   | 26 | 114 | 133 | 235 | 150 |
| 188*  | 27 | 125 | 133 | 235 | 150 |
| 188r  | 26 | 114 | 133 | 235 | 150 |
| 189   | 28 | 100 | 133 | 210 | 150 |
| 189r  | 29 | 100 | -   | 210 | 150 |
| 189r* | 30 | 100 | -   | 272 | 150 |
| 191   | 14 | 94  | -   | 210 | 105 |
| 191r  | 14 | 94  | -   | 210 | 105 |
| 193   | 14 | 94  | -   | 210 | 150 |
| 193r  | 14 | 94  | -   | 210 | 150 |
| 198   | 17 | 94  | 150 | 200 | 105 |
| 198r  | 1  | 94  | 157 | 200 | 105 |
| 199   | 31 | 100 | 150 | 200 | 105 |
| 199r  | 31 | 100 | 150 | 200 | 105 |
| 201   | 5  | 94  | 133 | 200 | 150 |
| 201r  | 33 | 100 | 133 | 200 | 150 |
| 203   | 17 | 94  | 150 | 200 | 150 |
| 203r  | 17 | 94  | 150 | 200 | 150 |
| 223   | 13 | 94  | 150 | 210 | 210 |
| 223r  | 34 | 200 | 157 | 200 | 210 |
| 224   | 13 | 94  | 150 | 210 | 210 |
| 224r  | 13 | 94  | 150 | 210 | 210 |
| 230   | 2  | 114 | 157 | 200 | 210 |
| 230*  | 1  | 94  | 157 | 200 | 210 |
| 230r  | 14 | 94  | -   | 210 | 210 |
| 234   | 13 | 94  | 150 | 210 | 210 |
| 234r  | 14 | 94  | -   | 210 | 210 |
| 237   | 35 | 70  | 150 | 200 | 210 |
| 237r  | 17 | 94  | 150 | 200 | 210 |
| 247   | 17 | 94  | 150 | 200 | 210 |
| 247r  | 36 | -   | 150 | 200 | 210 |
| 252   | 31 | 100 | 150 | 200 | 210 |
| 252r  | 31 | 100 | 150 | 200 | 210 |
| 258   | 37 | 100 | 150 | 235 | 210 |
| 258r  | 38 | 94  | 179 | 200 | 210 |
| 259   | 39 | 100 | -   | 235 | 210 |
| 259r  | 40 | 100 | 179 | 235 | 210 |
| 260   | 27 | 125 | 133 | 235 | 210 |
| 260r  | 31 | 100 | 150 | 200 | 210 |
| 261   | 41 | 200 | 133 | 200 | 210 |
| 261r  | 32 | -   | 133 | 200 | 210 |
| 262   | 42 | 114 | 133 | -   | 210 |
| 262r  | 42 | 114 | 133 | -   | 210 |
| 265   | 43 | 100 | -   | 200 | 210 |
| 265r  | 43 | 100 | -   | 200 | 210 |
| 268   | 7  | 94  | -   | 200 | 210 |
| 268r  | 44 | 114 | -   | 235 | 210 |
| 269   | 45 | 94  | 157 | 235 | 210 |
| 269r  | 1  | 94  | 157 | 200 | 210 |

|          |      |     |     |     |     |     |
|----------|------|-----|-----|-----|-----|-----|
|          | 271  | 46  | 114 | -   | 200 | 210 |
|          | 271r | 46  | 114 | -   | 200 | 210 |
|          | 272  | 43  | 100 | -   | 200 | 210 |
|          | 272r | 44  | 114 | -   | 235 | 210 |
|          | 279  | 7   | 94  | -   | 200 | 210 |
|          | 279r | 47  | 114 | 157 | 235 | 210 |
| Medellin | 1    | 31  | 100 | 150 | 200 | 210 |
|          | 1R   | 26  | 114 | 133 | 235 | 210 |
|          | 2    | 37  | 100 | 150 | 235 | 210 |
|          | 2R   | 5   | 94  | 133 | 200 | 210 |
|          | 3    | 33  | 100 | 133 | 200 | 210 |
|          | 3R   | 48  | 114 | 150 | 235 | 210 |
|          | 3R*  | 49  | 114 | 150 | 210 | 210 |
|          | 4    | 10  | 94  | 133 | 210 | 210 |
|          | 4R   | 48  | 114 | 150 | 235 | 210 |
|          | 5    | 45  | 94  | 157 | 235 | 210 |
|          | 5R   | 33  | 100 | 133 | 200 | 210 |
|          | 6    | 50  | 100 | 133 | 235 | 210 |
|          | 6R   | 50  | 100 | 133 | 235 | 210 |
|          | 7    | 5   | 94  | 133 | 200 | 210 |
|          | 7R   | 47  | 114 | 150 | 235 | 210 |
|          | 7R*  | 48  | 114 | 157 | 235 | 210 |
|          | 8    | 51  | 94  | 133 | 235 | 210 |
|          | 8R   | 26  | 114 | 133 | 235 | 210 |
|          | 9    | 43  | 100 | -   | 200 | 210 |
|          | 9R   | 27  | 125 | 133 | 235 | 210 |
|          | 9R*  | 51  | 94  | 133 | 235 | 210 |
|          | 10   | 52  | 94  | -   | 235 | 210 |
|          | 10R  | 53  | 114 | 150 | 200 | 210 |
|          | 11   | 54  | 125 | 150 | 210 | 210 |
|          | 11R  | 50  | 100 | 133 | 235 | 210 |
|          | 12   | 5   | 94  | 133 | 200 | 210 |
|          | 12R  | 47  | 114 | 157 | 235 | 210 |
|          | 13   | 33  | 100 | 133 | 200 | 210 |
|          | 13R  | 33  | 100 | 133 | 200 | 210 |
|          | 14   | 31  | 100 | 150 | 200 | 210 |
|          | 14R  | 31  | 100 | 150 | 200 | 210 |
|          | 15   | 33  | 100 | 133 | 200 | 210 |
| 15R      | 33   | 100 | 133 | 200 | 210 |     |
| 16       | 33   | 100 | 133 | 200 | 210 |     |
| 16R      | 33   | 100 | 133 | 200 | 210 |     |

\*Second haplotype designation in case of polyclonal infection
